# Supplementary material for: Aptamer-Modified Erythrocyte Membrane-Coated pH-Sensitive Nanoparticles for c-Met-Targeted Therapy of Glioblastoma Multiforme
Source: MDPI journal article supplement (doi:10.3390/membranes12080744), 2022-07-29
Supplement: s1 [file s1]

Supplementary files

# Aptamer-modified erythrocyte membrane-coated pH-sensitive nanoparticles for c-Met-targeted therapy of glioblastoma multiforme

Xianping Liu, Yixin Chen, Daoying Geng, Haichun Li, Ting Jiang, Zimiao Luo, Jianhong Wang, Zhiqing Pang and Jun Zhang

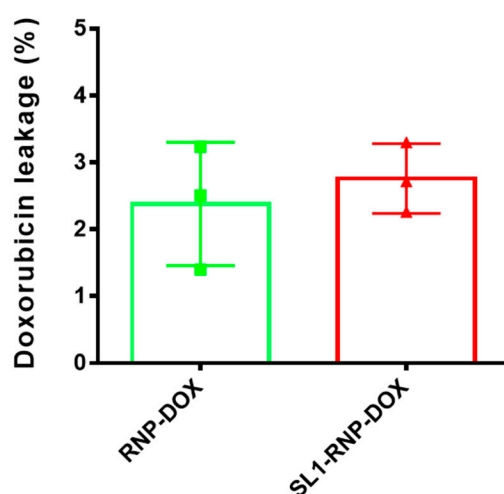

Figure S1 DOX leakage from RNP-DOX and SL1-RNP-DOX after a week storage at 4 °C in PBS.

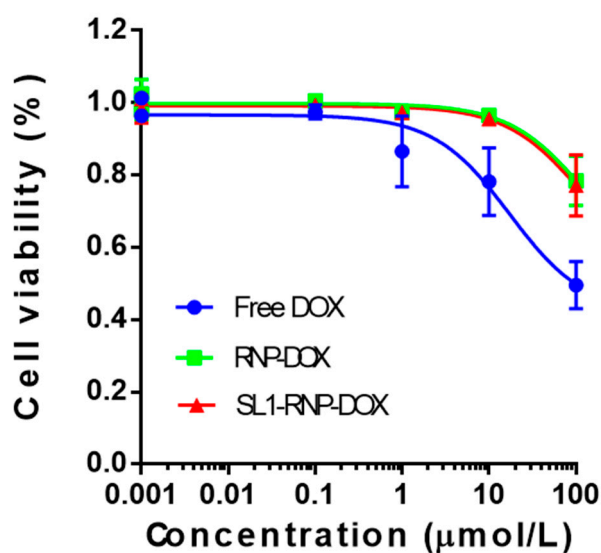

Figure S2 Cell viability of HUVECs treated with free DOX, RNP-DOX, and SL1-RNP-DOX ( $n = 4$ ).
